# Supplementary material
Source: PubMed Central journal article supplement (PMC2639176)
Supplement: btn444_1.pdf [file btn444_1.pdf]

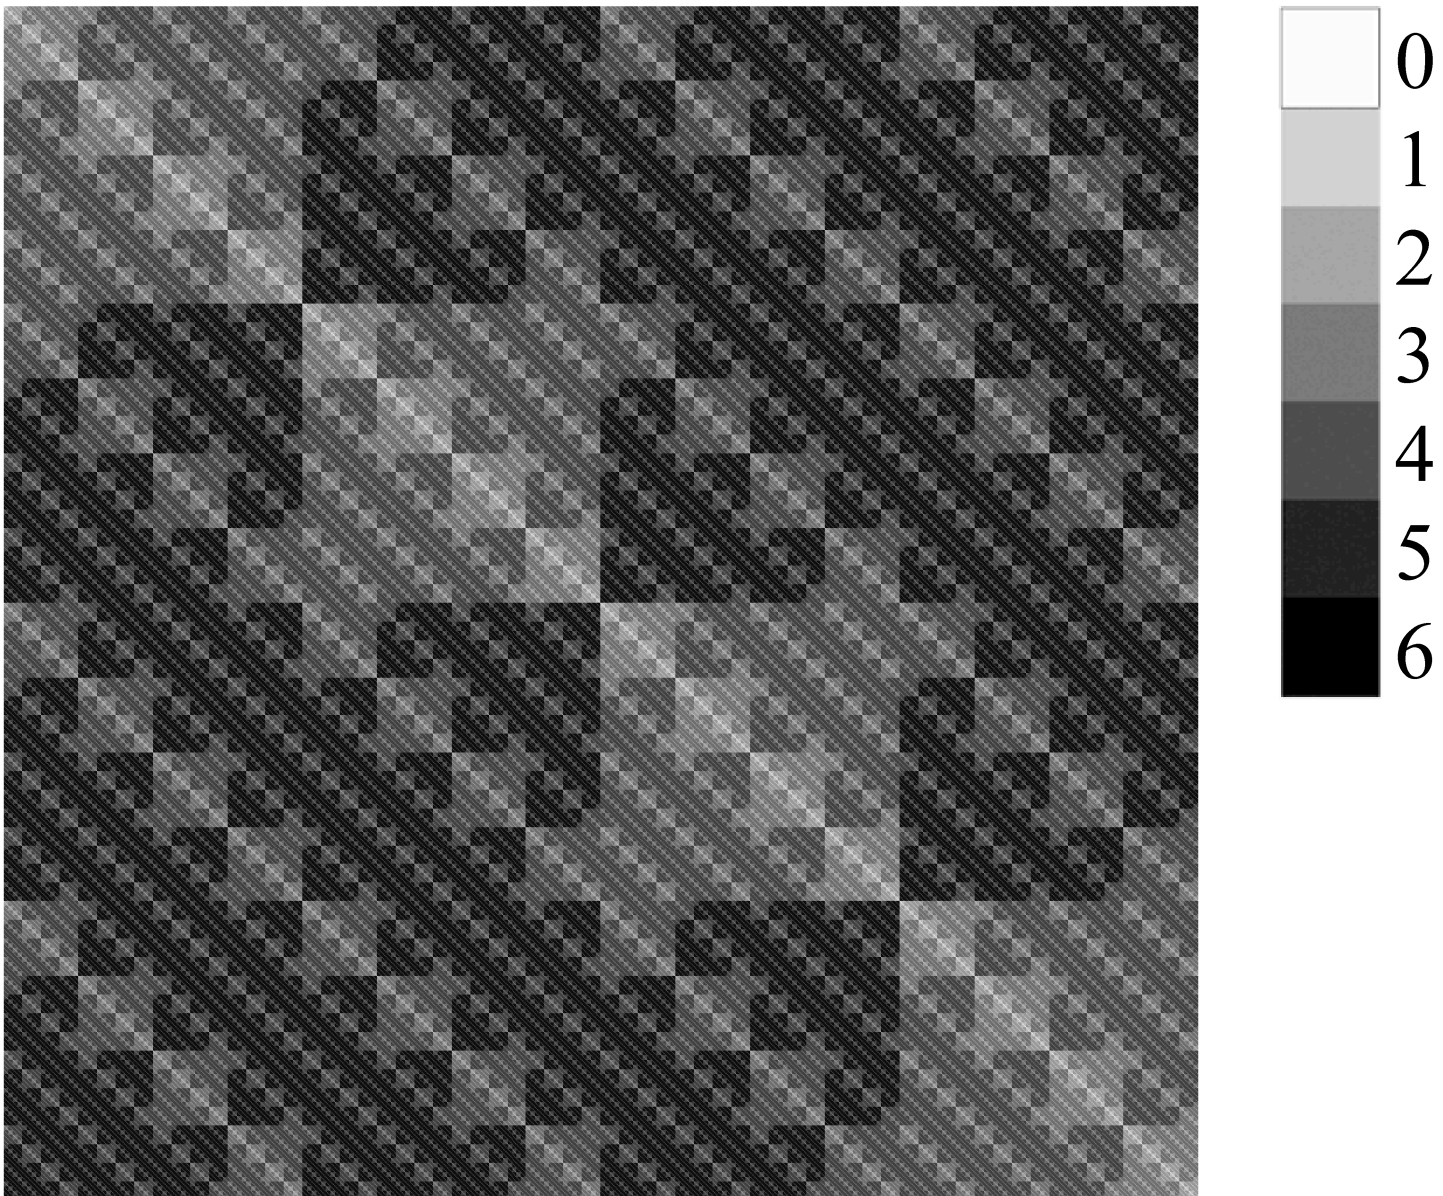

**Figure 4. Heat map of Hamming distances between words of length six.** White corresponds to a HD of zero and black corresponds to a HD of six.
